# Supplementary material
Source: ML conference proceedings conference paper supplement (https://openaccess.thecvf.com/content/CVPR_2020/html/Mentzer_Learning_Better_Lossless_CVPR_2020_paper.html)
Supplement: Supplementary file 1 [file Mentzer_Learning_Better_Lossless_CVPR_2020_supplemental.pdf]

## A. Learning Better Lossless Compression Using Lossy Compression – Supplementary

### A.1. Q-Classifier Architecture

We show the architecture for the Q-Classifier in Table A1. *Residual* denotes a sequence of convolution, ReLU, convolution, with a skip connection adding the input to the output (as in [15], but without BatchNorm).

| Layer               | $C_{\text{in}}$ | $C_{\text{out}}$ | Filter       | Stride |
|---------------------|-----------------|------------------|--------------|--------|
| Conv + ReLU         | 3               | 64               | $5 \times 5$ | 2      |
| Conv + ReLU         | 64              | 128              | $5 \times 5$ | 2      |
| $4 \times$ Residual | 128             | 128              | $3 \times 3$ |        |
| Conv                | 128             | 256              | $5 \times 5$ | 2      |
| $4 \times$ Residual | 256             | 256              | $3 \times 3$ |        |
| Channel-Avg.        | 256             | 256              |              |        |
| Linear              | 256             | $ \mathcal{Q} $  |              |        |

Table A1. Q-Classifier architecture.

### A.2. BPG Performance

Fig. A1 compares the performance of BPG on Kodak, in terms of PSNR, to the recent learned image compression approach from Minnen *et al.* [30]. The plot is digitized from Figure 2 in [30].

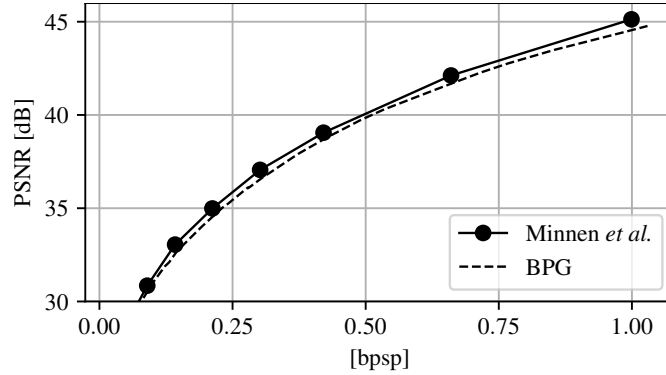

Figure A1. Comparing BPG to Minnen *et al.* [30]

### A.3. Examples from the testing sets

We provide additional visual examples here:

[https://data.vision.ee.ethz.ch/mentzerf/rc/rc\\_suppl\\_additional.pdf](https://data.vision.ee.ethz.ch/mentzerf/rc/rc_suppl_additional.pdf)

Specifically, we show one image from each of our testing sets, alongside with the residual  $r$  and a sample from  $p(r)$ , which is expected to be visually similar to  $r$ . Please refer to Section 6.4 for details on sampling and the visualization.
